# Supplementary material for: H2A.Z controls the stability and mobility of nucleosomes to regulate expression of the LH genes
Source: PubMed Central journal article supplement (PMC5036153; doi:10.1038/ncomms12958), 2016-09-22
Supplement: ncomms12958-s1.pdf [file ncomms12958-s1.pdf]

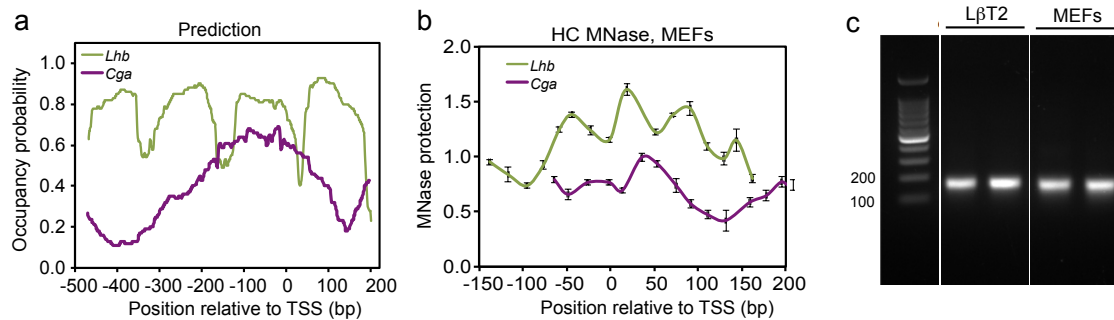

**Supplementary Figure 1: Additional characterization of nucleosome positioning.**

(a) Sequence-based prediction of nucleosome positions for the promoters of *Cga* and *Lhb*. (b) High-coverage nucleosome maps were carried out in MEF cells, as in Fig 1c, and data is presented and analyzed similarly,  $n = 3-4$ . (c) Typical MNase digestion of genomic DNA of different cells used in the MNase experiments under the same conditions. Digested genomic DNA of LβT2 and MEFs was purified and run on a 2% agarose gel.

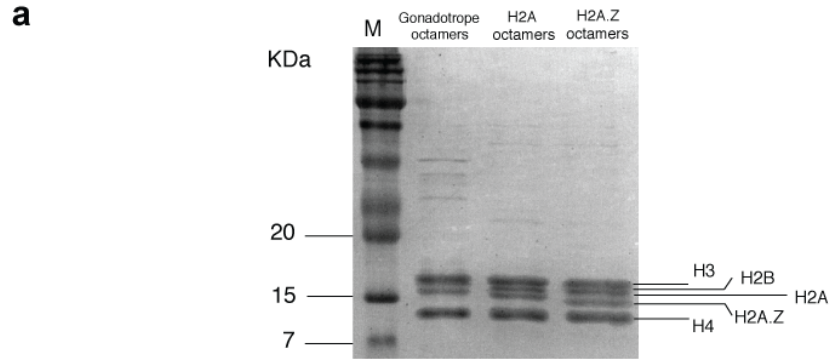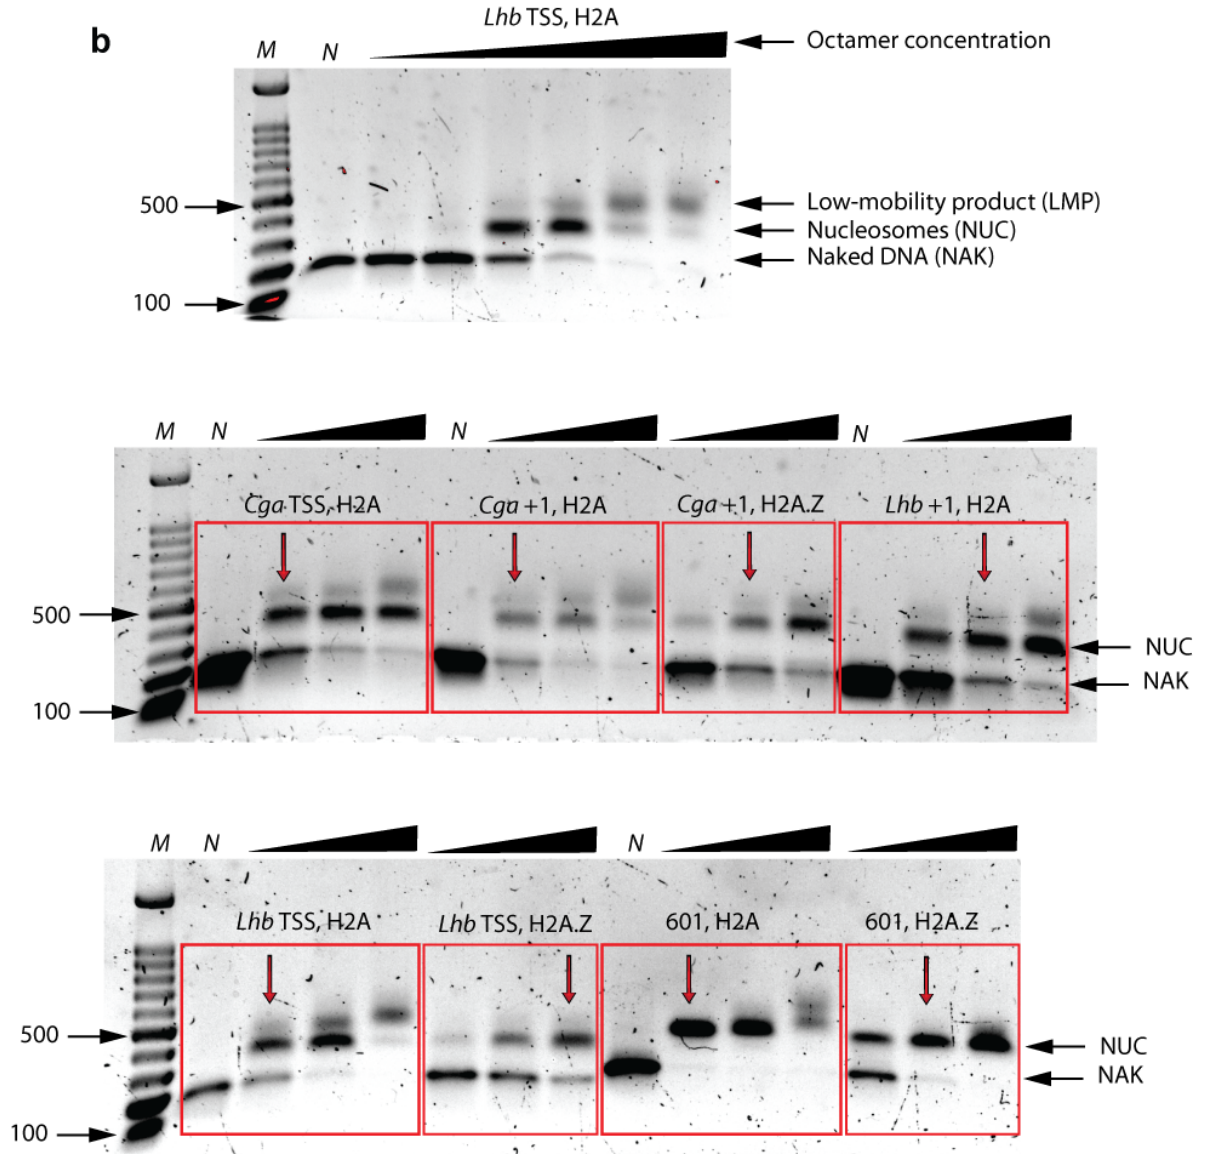

**Supplementary Figure 2: Integrity of histones, nucleosomes and single-molecule optical-tweezers constructs.** (a) Recombinant histones were expressed in bacteria separately as (H2A/H2B)<sub>2</sub> or (H2A.Z/H2B)<sub>2</sub> dimers and (H3/H4)<sub>4</sub> tetramers, mixed in a 2:1 (dimer:tetramer) molar ratio for reconstitution by salt gradient dialysis and run on 12.5% SDS-PAGE. Note that the H2A.Z band can be readily discriminated from that of H2A. Octamers purified from gonadotrope cells were used as a positive control. (b) Typical nucleosome reconstitution used for optical-tweezers experiments. DNA (221 bp for 601; 160 bp for *Lhb* and *Cga* constructs) was titrated with increasing amounts of histones for each reconstitution reaction. All the reconstitutions were performed at the same conditions and 1/8 of each reconstitution reaction was run on a 1% agarose gel post-stained with EtBr. “N” stands for naked DNA – with no histones. Three bands are seen in the gels, with intensities that vary depending on the concentration of histones used for the reconstitution: Naked DNA (NAK), nucleosomes (NUC), and a lower mobility product (LMP) that appears at high histone concentrations. We attribute this band to non-specific binding of histones to DNA, as indicated by their mobility and by their inability to efficiently ligate to the dsDNA handles, which suggests that the restrictions sites are covered by histones. To improve the purity of our nucleosomes, we chose samples (indicated by the red arrows) at an octamer concentration below the one that resulted in the nucleosome’s band peak intensity. In this way, while we had a significant fraction of naked DNA (which can be easily identified in the optical tweezers), we had practically no traces with non-specific histone binding to DNA.

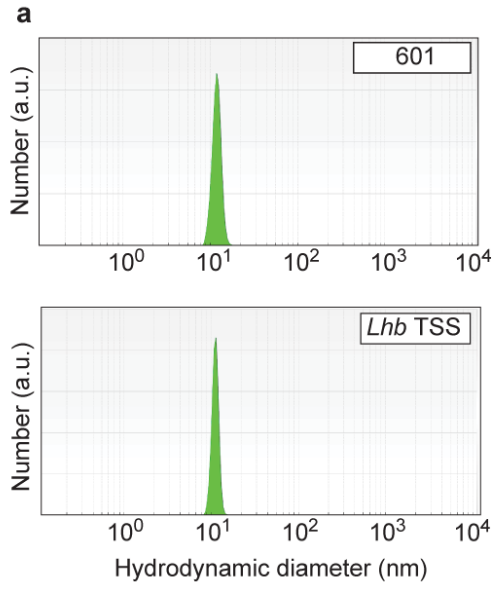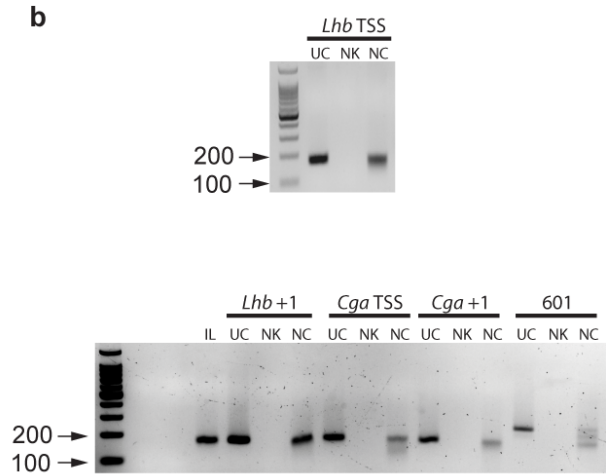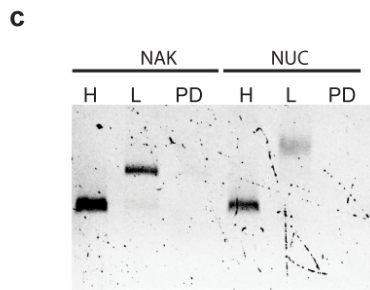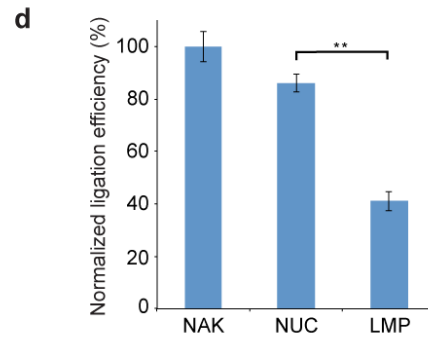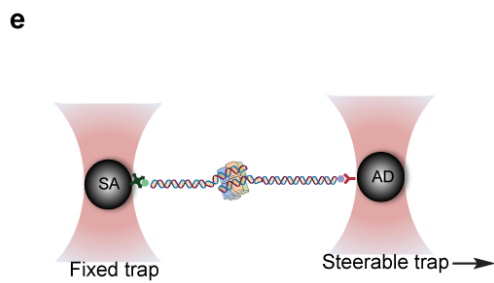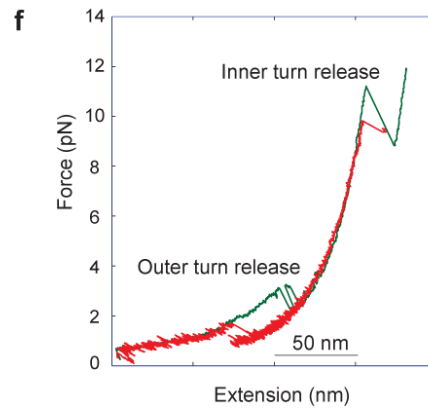

**Supplementary Figure 3: Additional characterization of reconstituted nucleosomes.**

(a) Nucleosomes reconstituted on 601 DNA (upper panel) and *Lhb* TSS (lower panel) were subjected to Dynamic Light Scattering analysis. Measured hydrodynamic diameters were  $10.7 \pm 1.2$  nm and  $10.3 \pm 1.4$  nm (mean  $\pm$  90% C.I.), for 601 DNA and *Lhb* TSS, respectively. (b) A total of  $\sim 2.5$  pmol of each reconstituted nucleosome was subjected to 20 gel units of MNase for 10 min at 37°C in reaction buffer. The DNA was purified using a PCR purification kit. The reaction products were run on a 2.5% agarose gel. UC = non-digested naked DNA construct, NK = digested naked DNA, NC = digested nucleosomes. (c) Reconstituted nucleosomes were ligated to dsDNA handles with a terminal digoxigenin, incubated with beads coated with antibodies against digoxigenin, pulled-down, and the supernatant was run on 1% agarose post stained with EtBr. H = dsDNA handles; L = ligation of handles and construct; PD = pull-down. (d) Ligation products were used as templates for a qPCR reaction, using a forward primer located in the dsDNA handle, and a reverse primer located in the reconstitution template. The results were normalized to the mean of the results obtained with naked DNA. NAK = naked DNA; NUC = nucleosome sample; LMP = sample at high octamer loading, with high concentration of LMP. The efficiency of ligation is 2.1-fold higher for NUC-rich samples as compared to LMP-rich samples ( $p=9 \times 10^{-4}$ , two-sample Student's t-test.). (e) Reconstituted nucleosomes were ligated at both ends to  $\sim 600$  bp dsDNA handles that allow to apply a stretching force on the construct. (f) Force-extension curves for 601 (green) and *Lhb* TSS (green) nucleosomes reveal the typical low-force opening of the outer turn, and high-force opening of the inner turn.

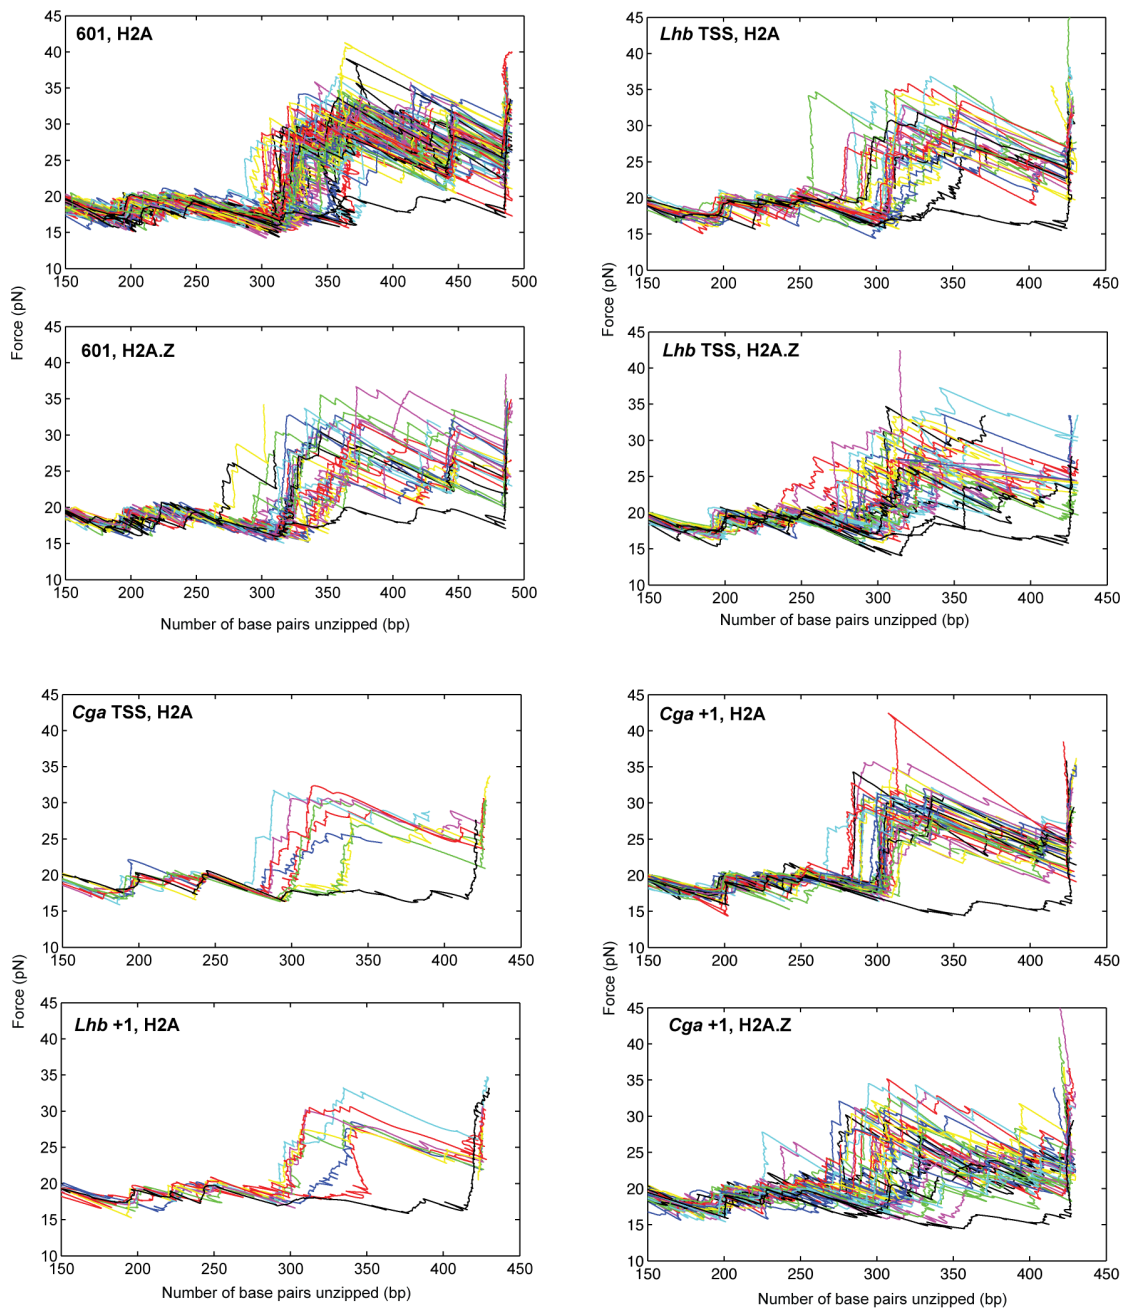

**Supplementary Figure 4: Single-molecule unzipping curves.** Unzipping traces for all of the nucleosomes measured (colored lines) together with a typical unzipping trace of their respective naked DNA (black).  $n=88, 27, 28, 34, 7, 8, 37, 38, 27, 28$ . Total=322.

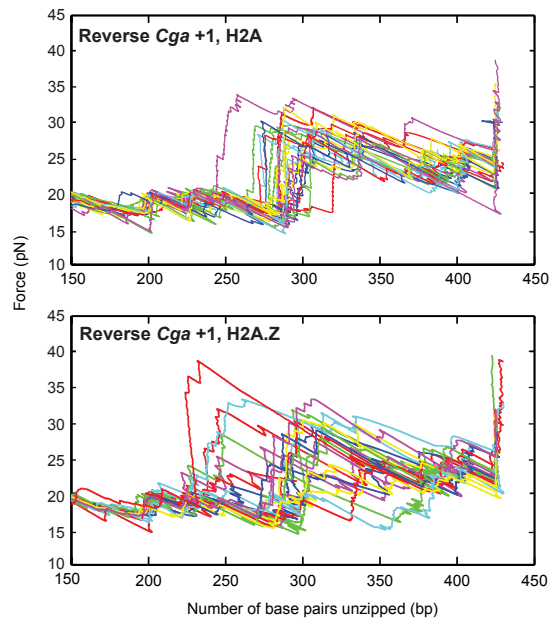

**Supplementary Figure 5: Reverse unzipping curves.** Representative unzipping traces for *Cga* +1 nucleosomes, ligated to the DNA handles in the reverse orientation. n=27, 28.

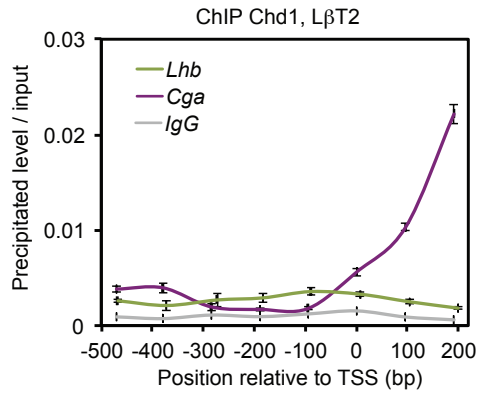

**Supplementary Figure 6: Chd1 is not located on the *Lhb* promoter.** ChIP for Chd1 was carried out in LβT2 cells expressing both *Cga* and *Lhb*. ChIP data is analyzed and presented as in Fig. 1d. Data are shown as mean ± SEM, n = 3.

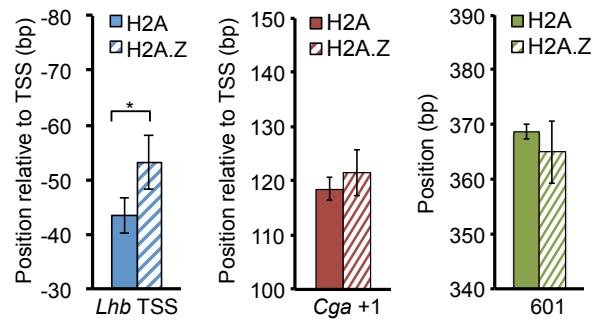

**Supplementary Figure 7: H2A.Z effect on the nucleosome's position.** Region 2 position for nucleosomes reconstituted with H2A (solid bars) and H2A.Z (dashed bars). Data shown as mean ± SEM, n≥34; For *Lhb* TSS, p=0.02; Kolmogorov-Smirnov test. \*p<0.05.



**Supplementary Table 1: Primers used for low-coverage MNase- and ChIP-qPCR**

| Number of amplicon | Amplicon center (relative to TSS) | Primer           | Primer sequence (5'→3')    |
|--------------------|-----------------------------------|------------------|----------------------------|
| 1                  | -470                              | <i>Cga</i> -525F | CACACCTGGACATATCTACTGT     |
|                    |                                   | <i>Cga</i> -425R | AATTGCTCCAATTTCTTAAATTAAC  |
| 2                  | -379                              | <i>Cga</i> -429F | GGAGCAATTGTTTTATTTTCTGT    |
|                    |                                   | <i>Cga</i> -329R | ATTAGCTAAGTACCTGATATTTTCA  |
| 3                  | -284                              | <i>Cga</i> -334F | GCTAATTAATGTGCTACTCTTAG    |
|                    |                                   | <i>Cga</i> -235R | GGCCATTTTCTATGTAATATTATTG  |
| 4                  | -188                              | <i>Cga</i> -238F | GGCCAAATGCTCTCTCTTCA       |
|                    |                                   | <i>Cga</i> -139R | TTGATCATATCACATTGCAACCC    |
| 5                  | -94                               | <i>Cga</i> -144F | GATCAATTGATGTCATGGTAATT    |
|                    |                                   | <i>Cga</i> -45R  | AATTGCATGTTCCAGCTG         |
| 6                  | +1                                | <i>Cga</i> -50F  | GCAATTTGTATTACTCTGCTGGT    |
|                    |                                   | <i>Cga</i> +50R  | GATTGTCTGATCTGAGGGGAA      |
| 7                  | +97                               | <i>Cga</i> +47F  | GTGGTCACAAATATTTTACTCTTT   |
|                    |                                   | <i>Cga</i> +147R | ATCACCTGCCCAGAACAC         |
| 8                  | +192                              | <i>Cga</i> +142F | CCACAGGAAACAATTTTCTGCATA   |
|                    |                                   | <i>Cga</i> +242R | ACAGACCTCCCTCCAACCTCA      |
| 1                  | -468                              | <i>Lhb</i> -518F | GACACACCCCTTACTTCCAGAG     |
|                    |                                   | <i>Lhb</i> -419R | GGATGCCTGGATTGGGTCCAA      |
| 2                  | -372                              | <i>Lhb</i> -422F | ATCCTGATTAGGGGCTGGGAG      |
|                    |                                   | <i>Lhb</i> -323R | GGCACAGCTTCAACCTTAGGTT     |
| 3                  | -273                              | <i>Lhb</i> -323F | CCTCCTATTTAGTTGTACCCAACCA  |
|                    |                                   | <i>Lhb</i> -224R | TAAAGGGGAGGCCACTGCAG       |
| 4                  | -183                              | <i>Lhb</i> -233F | CTCCCCTTTACCTTGTTTCCCGT    |
|                    |                                   | <i>Lhb</i> -134R | CAGGGACTAGCTCCAGTGTC       |
| 5                  | -89                               | <i>Lhb</i> -139F | TCCCTGGCTTCCCTGACCTTG      |
|                    |                                   | <i>Lhb</i> -40R  | TGGGGGTGGCAAGGCCACTA       |
| 6                  | +8                                | <i>Lhb</i> -42F  | CCACAACCCGCAGGTATAA        |
|                    |                                   | <i>Lhb</i> +58R  | GATTGGGAAGTACCCTGGG        |
| 7                  | +105                              | <i>Lhb</i> +55F  | AATCCCACCAAACCCATAGATG     |
|                    |                                   | <i>Lhb</i> +154R | GTTTATCTCCTGTTTGAAGTCCAC   |
| 8                  | +200                              | <i>Lhb</i> +150F | TAAACAGATTTTCATGGCTGGTGATG |
|                    |                                   | <i>Lhb</i> +249R | TCTACCCCTGACCTGGTTTTTC     |

**Supplementary Table 2: Primers used for high-coverage MNase-qPCR**

| Number of amplicon | Amplicon center (relative to TSS) | Primer           | Primer sequence (5'→3')         |
|--------------------|-----------------------------------|------------------|---------------------------------|
| 1                  | -65                               | <i>Cga</i> -100F | TGGGTAGAATTTACCCCTGATCC         |
|                    |                                   | <i>Cga</i> -31R  | CAGCAGAGTAATACAAATTGCAT         |
| 2                  | -49                               | <i>Cga</i> -83F  | TGATCCCTGAGCTTATGTGC            |
|                    |                                   | <i>Cga</i> -14R  | CCCACTGTCTTTTATACCAG            |
| 3                  | -26                               | <i>Cga</i> -61F  | CTGGGAACATGCAATTTGTA            |
|                    |                                   | <i>Cga</i> +8R   | GTGCCTGCAGTTAATAAAGTCT          |
| 4                  | -2                                | <i>Cga</i> -39F  | ACTCTGCTGGTATAAAAGACAG          |
|                    |                                   | <i>Cga</i> +34R  | GGGGAACAATGTCTCTGGATT           |
| 5                  | +14                               | <i>Cga</i> -20F  | CAGTGGGAGACTTTATTAAGTGC         |
|                    |                                   | <i>Cga</i> +48R  | GATTGTCCGATCTGAGGGGAAC          |
| 6                  | +36                               | <i>Cga</i> -1F   | CTGCAGGCACTGAAAAATCCA           |
|                    |                                   | <i>Cga</i> +72R  | TTGAGGGATGTGTTCTGGGCA           |
| 7                  | +54                               | <i>Cga</i> +19F  | AGAGACATTGTTCCCCTCAG            |
|                    |                                   | <i>Cga</i> +88R  | CCTACCTCTGGACTTTTTGAG           |
| 8                  | +75                               | <i>Cga</i> +39F  | ATCGACAATCACCTGCCAG             |
|                    |                                   | <i>Cga</i> +111R | CCCCAAATGATTCATCATATTACC        |
| 9                  | +92                               | <i>Cga</i> +56F  | CAGAACACATCCCTCAAAAAG           |
|                    |                                   | <i>Cga</i> +127R | CTCTTTAATTAATCCCCCAA            |
| 10                 | +111                              | <i>Cga</i> +76F  | GTCCAGAGGTAGGTAATATGATG         |
|                    |                                   | <i>Cga</i> +146R | TGTGGTCACAAATATTTACTC           |
| 11                 | +132                              | <i>Cga</i> +97F  | TGAAATCATTGTTGGGGGATT           |
|                    |                                   | <i>Cga</i> +166R | TTATGCAGAAAATTCTTTCTGT          |
| 12                 | +159                              | <i>Cga</i> +124F | AGAGTAAAATATTTGTGACCACAG        |
|                    |                                   | <i>Cga</i> +194R | GAATGCCTAATTATTTCCCTACC         |
| 13                 | +178                              | <i>Cga</i> +143F | CACAGGAAAGAATTTCTGCA            |
|                    |                                   | <i>Cga</i> +214R | GCACCATAAAGAAAATTAATGAATGCC     |
| 14                 | +195                              | <i>Cga</i> +160F | TGCATAAATGTTGGTAGGAAAATAATTAGGC |
|                    |                                   | <i>Cga</i> +230R | TCCAACCTCAGCCATGAGCAC           |
| 15                 | +209                              | <i>Cga</i> +172F | GGTAGGAAAATAATTAGGCATTCATT      |
|                    |                                   | <i>Cga</i> +245R | TTCTACAGACCTCCCTCCAA            |
| 16                 | +231                              | <i>Cga</i> +196F | TTAATTTCTTTATGGTGCTCATGG        |
|                    |                                   | <i>Cga</i> +265R | ACGATTGCCTTAGCTTACAG            |

**Supplementary Table 2: Primers used for high-coverage MNase-qPCR (continuation)**

| Number of amplicon | Amplicon center (relative to TSS) | Primer           | Primer sequence (5'→3')  |
|--------------------|-----------------------------------|------------------|--------------------------|
| 1                  | -138                              | <i>Lhb</i> -173F | TGAGGCCAATTCACTGGGACAC   |
|                    |                                   | <i>Lhb</i> -103R | TTGGGGGGCGAGACACAGACAA   |
| 2                  | -117                              | <i>Lhb</i> -152F | ACTGGAGCTAGTCCCTGGCTT    |
|                    |                                   | <i>Lhb</i> -81R  | GGTAACCTAGACACTAATCTCTT  |
| 3                  | -96                               | <i>Lhb</i> -130F | TCCCTGACCTTGTCTGTGTC     |
|                    |                                   | <i>Lhb</i> -61R  | AAGTAGTGGCTACAGGCTTGG    |
| 4                  | -77                               | <i>Lhb</i> -111F | CGCCCCAAAGAGATTAGTGT     |
|                    |                                   | <i>Lhb</i> -42R  | TGGGGGTGGCAAGGCCACTA     |
| 5                  | -57                               | <i>Lhb</i> -94F  | GTGTCTAGGTTACCCAAGCCT    |
|                    |                                   | <i>Lhb</i> -23R  | GCTTTATACCTGCGGGTGT      |
| 6                  | -44                               | <i>Lhb</i> -79F  | AAGCCTGTAGCCACTACTTAG    |
|                    |                                   | <i>Lhb</i> -9R   | ACCTTGGGCACCTGGCTTTA     |
| 7                  | -23                               | <i>Lhb</i> -58F  | TGGCCTTGCCACCCCCACAA     |
|                    |                                   | <i>Lhb</i> +12R  | CTCCATTCTTGATACCTTCCC    |
| 8                  | -1                                | <i>Lhb</i> -36F  | CGCAGGTATAAAGCCAGGTGC    |
|                    |                                   | <i>Lhb</i> +34R  | TGGGCCCTACCATCTTACCT     |
| 9                  | +19                               | <i>Lhb</i> -17F  | CCCAAGGTAGGGAAGGTATCA    |
|                    |                                   | <i>Lhb</i> +54R  | ATTGGGAAGTACCCTGGGC      |
| 10                 | +51                               | <i>Lhb</i> +16F  | GAGGCTCCAGGTAAGATGGT     |
|                    |                                   | <i>Lhb</i> +86R  | AAGGCTGTCCATCTATGGGT     |
| 11                 | +71                               | <i>Lhb</i> +36F  | AGGGCCCAGGGTACTTCCCA     |
|                    |                                   | <i>Lhb</i> +106R | TCCTCCAACCCCCAGGTCAC     |
| 12                 | +91                               | <i>Lhb</i> +56F  | ATCCCACCAAACCCATAGAT     |
|                    |                                   | <i>Lhb</i> +126R | AGGAGACCCCCCTCCTCTC      |
| 13                 | +111                              | <i>Lhb</i> +75F  | TGGACAGCCTTGTGACCT       |
|                    |                                   | <i>Lhb</i> +146R | TGTTTGAAGTCCACCAGCT      |
| 14                 | +130                              | <i>Lhb</i> +92F  | TGGGGGTGGAGGAGGGA        |
|                    |                                   | <i>Lhb</i> +167R | CCATGAAATCTGTTTATCTCCTG  |
| 15                 | +144                              | <i>Lhb</i> +109F | AGAGGAGGGGTCTCCTA        |
|                    |                                   | <i>Lhb</i> +179R | GACCCATCACCAGCCATGA      |
| 16                 | +162                              | <i>Lhb</i> +127F | GCTGGTGGACTTCAAACAG      |
|                    |                                   | <i>Lhb</i> +197R | ACAGAAACTGTCCTTCAAGAC    |
| 17                 | +180                              | <i>Lhb</i> +145F | GGAGATAAACAGATTTTCATGGC  |
|                    |                                   | <i>Lhb</i> +215R | GCACCCACTCAGTATAATACA    |
| 18                 | +202                              | <i>Lhb</i> +167F | TGGTGATGGGTCTTGAAGGA     |
|                    |                                   | <i>Lhb</i> +237R | TGGTTTTTCCATCCCAGGT      |
| 19                 | +221                              | <i>Lhb</i> +185F | GACAGTTTCTGTATTATACTGAGT |
|                    |                                   | <i>Lhb</i> +257R | CTCACTCTACCCCTGACC       |

**Supplementary Table 3: Primers used for mRNA quantification using qPCR**

| Gene         | Primer<br>(position relative to TSS) | Primer sequence (5'→3')   |
|--------------|--------------------------------------|---------------------------|
| <i>Cga</i>   | +97F                                 | ATGGATTACTACAGAAAATATGCAG |
|              | +196R                                | CCTGAATAATAAAGTCTCCATCAGG |
| <i>Lhb</i>   | +200F                                | TGCCGGCTGCTTTGCCTCCT      |
|              | +396R                                | CAGGCCATTGGTTGAGTCCT      |
| <i>RPL0P</i> | +96F                                 | GCGACCTGGAAGTCCAATA       |
|              | +296R                                | ATCTGCTGGAGCCACAT         |

**Supplementary Table 4:** Primers used for PCR amplification of DNA sequences used for *Lhb*, *Cga* and 601 nucleosomes reconstitution

| Gene/<br>sequence                       | Nucleosome | Incorporated<br>restriction site | Primer<br>(position rel. to TSS) | Primer sequence (5'→3')                         |
|-----------------------------------------|------------|----------------------------------|----------------------------------|-------------------------------------------------|
| <i>Lhb</i>                              | TSS        | BglII                            | -130F                            | ATGGCCTTGCCGGCC<br>CTGACCTTGTCTGTGT<br>CTC      |
|                                         |            | DraIII                           | +23R                             | ATCACTGCGTGGAGC<br>CTCTCCATTCTTGAT              |
|                                         | +1         | BglII                            | +29F                             | ATGGCCTTGCCGGCG<br>ATGGTAGGGCCCAGG<br>GTA       |
|                                         |            | DraIII                           | +17R                             | ATCACTGCGTGAGAC<br>CCATCACCAGCCATG              |
| <i>Cga</i>                              | TSS        | BglII                            | -159F                            | ATGGCCTTGCCGGCT<br>GCAATGTGATATGAT<br>CAATTGATG |
|                                         |            | DraIII                           | -9R                              | ATCACTGCGTGAGTC<br>TCCCACTGTCTTTTAT<br>AC       |
|                                         | +1         | BglII                            | +39F                             | ATGGCCTTGCCGGCA<br>TCGACAATCACCTGC<br>CC        |
|                                         |            | DraIII                           | +189R                            | ATCACTGCGTGCTAA<br>TTATTTTCCTACCAAC<br>ATTTATGC |
| <i>601<br/>positioning<br/>sequence</i> | <i>601</i> | BglII                            | F                                | ATGGCCTTGCCGGCC<br>GATGGACCCTATACG<br>CGGCC     |
|                                         |            | DraIII                           | R                                | ATCACTGCGTGGAAT<br>TCGATATCCCCGAGA<br>AGG       |

**Supplementary Table 5:** Primers used for PCR amplification of DNA sequences used for optical tweezers handles preparation

| Name                 | Primer/modification       | Primer sequence (5'→3')                   |
|----------------------|---------------------------|-------------------------------------------|
| <i>Biotin handle</i> | F (5'-biotin)             | GCTTTAATGCGGTAGTTTATCA                    |
|                      | R (Nt.BbvCI)              | GCAGCATTAGGAAGCAGCCCAGGCATTAGGAAGCAGCCCAG |
| <i>Dig handle</i>    | F (5'-phosphate/Nb.BbvCI) | GCATTAGGAAGCAGCCCAGGCTTTATTGCGGTAGTTTATCA |
|                      | R (5'-digoxigenin)        | GCATTAGGAAGCAGCCCAG                       |
| <i>601 alignment</i> | F (BglI)                  | ATGGCCTGCACGGCCGATGGACCCTATACGCGGC<br>C   |
|                      | R (DraIII)                | ATCACTGCGTGGAATTCGATATCCCCGAGAAGG         |

**Supplementary Table 6:** DNA sequences used for *Lhb*, *Cga* and 601 nucleosomes reconstitution

| Nucleosome                   | DNA sequence (5' → 3')                                                                                                                                                                                                                                                   |
|------------------------------|--------------------------------------------------------------------------------------------------------------------------------------------------------------------------------------------------------------------------------------------------------------------------|
| <i>Cga</i> TSS<br>(-9/-159)  | TGCAATGTGATATGATCAATTGATGTCATGGTAATTATACCAAGTGCCATCCAA<br>TCACTGGGTAGAAATTTACCCCTGATCCCTGAGCTTATGTGCAGCTGGGAACATG<br>CAATTTGTATTACTCTGCTGGTATAAAAAGACAGTGGGAGACT                                                                                                         |
| <i>Cga</i> +1<br>(+39/+189)  | ATCGACAATCACCTGCCCAGAACACATCCCTCAAAAAGTCCAGAGGTAGGTAA<br>TATGATGAAATCATTTGGGGGGATTTAATTAAGAGTAAAATATTTGTGACCA<br>CAGGAAAGAATTTTCTGCATAAATGTTGGTAGGAAAATAATTAG                                                                                                            |
| <i>Lhb</i> TSS<br>(-128/+23) | CCTGACCTTGTCTGTGCTCGCCCCAAAGAGATTAGTGTCTAGGTTACCCAAG<br>CCTGTAGCCACTACTTAGTGGCCTTGCCACCCCAACCCGCAGGTATAAAG<br>CCAGGTGCCCAAGGTAGGGAAGGTATCAAGAATGGAGAGGCTC                                                                                                                |
| <i>Lhb</i> +1<br>(+29/+179)  | GATGGTAGGGCCAGGGTACTTCCAATCCCACCAACCCATAGATGGACAGC<br>CTTGTGACCTGGGGTTGGAGGAGGGAGAGGGGGTCTCCTAGCTGGTGGAA<br>CTTCAAACAGGAGATAAACAGATTTTCATGGCTGGTGTATGGGTCT                                                                                                               |
| 601<br>(221 bp)*             | TGCGTGGAATT <b>CGATATCCCCGAGAAGGTCGCTGTTCAATACATGCACAGGAT</b><br><b>GTATATATCTGACACGTGCCCTGGAGACTAGGGAGTAATCCCCTTGGCGGT</b><br><b>TAAACGCGGGGGACAGCGCGTACGTGCGTTAAGCGGTGCTAGAGCTTG</b><br><b>CTACGACCAATTGAGCGGCCTCGGCACCGGATTCTCCAGGGCGGCCGCGT</b><br>ATAGGGTCCATCGGCCG |

(\*) The canonical 601 sequence, composed of 150 bp, is marked in bold.

**Supplementary Table 7:** Quantification of the purity of reconstituted nucleosomes used in the optical tweezers experiments

| Construct      |       | NAK | NUK | LMP | Purity   |                 |
|----------------|-------|-----|-----|-----|----------|-----------------|
|                |       |     |     |     | From Gel | After ligation* |
| <i>Lhb</i> TSS | H2A   | 41% | 53% | 5%  | 91%      | >96%            |
| <i>Cga</i> TSS | H2A   | 41% | 52% | 7%  | 88%      | >94%            |
| <i>Cga</i> +1  | H2A   | 39% | 53% | 8%  | 87%      | >93%            |
| <i>Cga</i> +1  | H2A.Z | 46% | 46% | 8%  | 85%      | >92%            |
| <i>Lhb</i> +1  | H2A   | 32% | 60% | 8%  | 88%      | >94%            |
| <i>Lhb</i> TSS | H2A   | 35% | 54% | 10% | 84%      | >92%            |
| <i>Lhb</i> TSS | H2A.Z | 31% | 61% | 8%  | 88%      | >94%            |
| 601            | H2A   | 1%  | 98% | 1%  | 99%      | 100%            |
| 601            | H2A.Z | 8%  | 90% | 2%  | 98%      | >99%            |

\* Based on at least 2:1 enrichment as indicated in Supplementary Fig. 3d
